# Supplementary material
Source: publisher figshare collection journal article supplement (https://sage.figshare.com/ndownloader/files/21001401)
Supplement: Supplementary file 1 [file 21001401]

**Appendix B. Overview of Child Maltreatment Instrument: Reasons for Exclusion.**

| No | Instrument <sup>a</sup> (alphabetical order)                                                                      | Abbreviation | Reason for exclusion                |
|----|-------------------------------------------------------------------------------------------------------------------|--------------|-------------------------------------|
| 1  | Adolescent Clinical Sexual Behavior Inventory (William N. Friedrich, Lysne, Sim, & Shamos, 2004)                  | ACSBI        | Not a measure of child maltreatment |
| 2  | Adolescent Sexual Behavior Inventory- Self Report (Wherry, Berres, Sim, & Friedrich, 2009)                        | ACSBI-S      | Not a measure of child maltreatment |
| 3  | Adult Attachment Interviews (Hesse, 2008)                                                                         | AAls         | Not a parent-report measure         |
| 4  | Adult-Adolescent Parenting Inventory (Bavolek, 1984)                                                              | AAPI         | Old version of a revised measure    |
| 5  | Adverse Childhood Experiences Questionnaire (Felitti et al., 1998)                                                | ACEs         | Not a parent-report measure         |
| 6  | Alabama Parenting Questionnaire (Shelton, Frick, & Wootton, 1996)                                                 | APQ          | Not a measure of child maltreatment |
| 7  | Assessing Environments (Berger, Knutson, Mehm, & Perkins, 1988)                                                   | AEIII        | Not a parent-report measure         |
| 8  | Assessment of parental awareness of the shaken baby syndrome <sup>b</sup> (Mann, Rai, Sharif, & Vavasseur, 2015)  | N/A          | No psychometric data found          |
| 9  | Body Image Victimization Experiences Scale (Duarte & Pinto-Gouveia, 2017)                                         | BIVES        | Not a measure of child maltreatment |
| 10 | Brief Child Abuse Potential Inventory (Ondersma, Chaffin, Mullins, & LeBreton, 2005)                              | BCAP         | Not a measure of child maltreatment |
| 11 | Brigid Collins Risk Screener (Weberling, Forgays, Crain-Thoreson, & Hyman, 2003)                                  | BCRS         | Not a measure of child maltreatment |
| 12 | California Family Risk Assessment (W. L. Johnson, 2011)                                                           | CFRA         | Not a parent-report measure         |
| 13 | Caregiver–Child Social/Emotional and Relationship Rating Scale (McCall, Groark, & Fish, 2010)                     | CCSERRS      | Not a measure of child maltreatment |
| 14 | Child Abuse Inventory at Emergency Rooms (Sittig et al., 2016)                                                    | CHAINER      | Not a parent-report measure         |
| 15 | Child Abuse Potential Inventory (Milner, 1986)                                                                    | CAP          | Not a measure of child maltreatment |
| 16 | Child Abuse Risk Assessment Scale (Chan, 2012)                                                                    | CARAS        | Not developed in English            |
| 17 | Child and Adolescent Trauma Screen (Sachser et al., 2017)                                                         | CATS         | Not a measure of child maltreatment |
| 18 | Child Behavior Checklist (Achenbach & Rescorla, 2000)                                                             | CBCL         | Not a measure of child maltreatment |
| 19 | Child emotional maltreatment module <sup>b</sup> (A. M. Slep, Heyman, & Snarr, 2011)                              | N/A          | No psychometric data found          |
| 20 | Child maltreatment assessment (Salum et al., 2016)                                                                | N/A          | Not developed in English            |
| 21 | Child Maltreatment Measure <sup>b</sup> (Tajima, Herrenkohl, Huang, & Whitney, 2004)                              | N/A          | No psychometric data found          |
| 22 | Child Protective Services Review Document (Fanshel, Finch, & Grundy, 1994)                                        | CPSRD        | Not a parent-report measure         |
| 23 | Child Reflective Functioning Scale (Ensink et al., 2015)                                                          | CRF          | Not a measure of child maltreatment |
| 24 | Child Sexual Behavior Inventory (W. N. Friedrich et al., 2001)                                                    | CSBI         | Not a measure of child maltreatment |
| 25 | Child Well-Being Scales (Gaudin, Polansky, & Kilpatrick, 1992)                                                    | CWBS         | Not a parent-report measure         |
| 26 | Childhood Experience of Care and Abuse (Brown, Craig, Harris, Handley, & Harvey, 2007)                            | CECA         | Not a parent-report measure         |
| 27 | Childhood Experience of Care and Abuse Questionnaire (N. Smith, Lam, Bifulco, & Checkley, 2002)                   | CECA.Q       | Not a parent-report measure         |
| 28 | Childhood Experiences of Violence Questionnaire (Walsh, MacMillan, Trocme, Jamieson, & Boyle, 2008)               | CEVQ         | Not a parent-report measure         |
| 29 | Childhood Trauma Interview (Fink, Bernstein, Handelsman, Foote, & Lovejoy, 1995)                                  | CTI          | Not a parent-report measure         |
| 30 | Childhood Trauma Questionnaire (Bernstein, Ahluvalia, Pogge, & Handelsman, 1997)                                  | CTQ          | Not a parent-report measure         |
| 31 | Childhood Trauma Questionnaire Short Form (Forde, Baron, Scher, & Stein, 2012)                                    | CTQ-SF       | Not a parent-report measure         |
| 32 | Child-Parent Relationship Scale (Driscoll & Pianta, 2011)                                                         | CPRS         | Not a measure of child maltreatment |
| 33 | Child–Parent Relationship Scale–Short Form (Pianta, 1992)                                                         | CPRS-SF      | Not a measure of child maltreatment |
| 34 | Children Intimate Relationships, and Conflictual Life Events Interview (Marshall, Feinberg, Jones, & Chote, 2017) | CIRCLE       | Not a parent-report measure         |
| 35 | Children's Impact of Traumatic Events Scale-Revised (Chaffin & Shultz, 2001)                                      | CITES-R      | Not a measure of child maltreatment |
| 36 | Christchurch Trauma Assessment (Nelson, Lynskey, Heath, & Martin, 2010)                                           | N/A          | Not a parent-report measure         |
| 37 | Cleveland Child Abuse Potential Scale (Ezzo & Young, 2012)                                                        | C-CAPS       | Not a parent-report measure         |
| 38 | Comprehensive Childhood Maltreatment Inventory (Riddle & Aponte, 1999)                                            | CCMI         | Not a parent-report measure         |
| 39 | Conflict Tactic Scale 2 (Straus et al., 2003)                                                                     | CTS 2        | Not a measure of child maltreatment |

(Continued)

**Appendix B. (continued)**

| No | Instrument <sup>a</sup> (alphabetical order)                                                                                 | Abbreviation             | Reason for exclusion                                                 |
|----|------------------------------------------------------------------------------------------------------------------------------|--------------------------|----------------------------------------------------------------------|
| 40 | Conflict Tactics Scales (Straus et al., 2003)                                                                                | CTS                      | Not a measure of child maltreatment                                  |
| 41 | Defense Style Questionnaire (Bond & Wesley, 1996)                                                                            | DSQ                      | Not a parent-report measure                                          |
| 42 | Disciplinary Methods Interview <sup>b</sup> (Thompson, 2017)                                                                 | N/A                      | Not a measure of child maltreatment                                  |
| 43 | Discipline Survey (Socolar, Savage, Devellis, & Evans, 2004)                                                                 | N/A                      | Not a measure of child maltreatment                                  |
| 44 | Dunedin Family Services Indicator (Muir et al., 1989)                                                                        | DFSI                     | Not a parent-report measure                                          |
| 45 | Dyadic Parent-Child Interaction Coding System-II (Eyberg, Bessmer, Newcomb, Edwards, & Robinson, 1994)                       | DPICS-II                 | Not a parent-report measure                                          |
| 46 | Egna Minnen Beträffande Uppfostran (My Memories of Upbringing) (Castro, de Pablo, Gomez, Arrindell, & Toro, 1997)            | EMBU                     | Not developed in English                                             |
| 47 | Egna Minnen Beträffande Uppfostran for Children (Castro et al., 1997; Markus, Lindhout, Boer, Hoogendijk, & Arrindell, 2003) | EMBU-C                   | Not a parent-report measure                                          |
| 48 | Emotional and Physical Abuse Questionnaire (Kemper, Carlin, & Buntain-Ricklefs, 1994)                                        | EPAB                     | Not a parent-report measure                                          |
| 49 | Environmental Harshness, Health, and Life History Strategy Indicators <sup>b</sup> (Chua, Lukaszewski, Grant, & Sng, 2017)   | N/A                      | Not a measure of child maltreatment                                  |
| 50 | Exposure to Community Violence (Richters & Martinez, 1993)                                                                   | ETV                      | Not a measure of child maltreatment                                  |
| 51 | Exposure to violence questionnaire <sup>b</sup> (Kuo, Mohler, Raudenbush, & Earls, 2000)                                     | N/A                      | Not a measure of child maltreatment                                  |
| 52 | Familial Experiences Questionnaire (Wheelock, Lohr, & Silk, 1997)                                                            | FEQ                      | Not a parent-report measure                                          |
| 53 | Family Affective Attitude Rating Scale (Waller, Gardner, Dishion, Shaw, & Wilson, 2012)                                      | FAARS                    | Not a measure of child maltreatment                                  |
| 54 | Family Aggression Screening Tool (Cecil, McCrory, Viding, Holden, & Barker, 2016)                                            | FAST                     | Not a parent-report measure                                          |
| 55 | Family Background Questionnaire-Brief (Melchert & Kalemeera, 2009)                                                           | FBQ-B                    | Not a parent-report measure                                          |
| 56 | Family Behaviors Screen (Simmons, Craun, Farrar, & Ray, 2017)                                                                | FBS                      | Not a measure of child maltreatment                                  |
| 57 | Family Betrayal Questionnaire (Delker, Smith, Rosenthal, Bernstein, & Freyd, 2017)                                           | FBQ                      | Not a measure of child maltreatment                                  |
| 58 | Family Law Detection of Overall Risk Screen (McIntosh, Wells, & Lee, 2016)                                                   | FL-DOORS                 | Not a measure of child maltreatment                                  |
| 59 | Family Maltreatment Diagnostic Criteria (Heyman & Smith Slep, 2009)                                                          | N/A                      | Not a parent-report measure                                          |
| 60 | Family Risk of Abuse and Neglect (Lennings, Brummert Lennings, Bussey, & Taylor, 2014)                                       | FRAAN                    | Not a measure of child maltreatment                                  |
| 61 | Family Therapy Alliance Scale (L. N. Johnson, Ketrings, & Anderson, 2013)                                                    | FTAS                     | Not a measure of child maltreatment                                  |
| 62 | Family Unpredictability Scale (Ross & Hill, 2000)                                                                            | FUS                      | Not a measure of child maltreatment                                  |
| 63 | Go/No-go Association Task Physical Discipline (Sturge-Apple, Rogge, Peltz, Suor, & Skibo, 2015)                              | GNAT-Physical Discipline | Not a measure of child maltreatment                                  |
| 64 | Home Observation Measure of the Environment (Caldwell & Bradley, 2003)                                                       | HOME                     | Not a parent-report measure                                          |
| 65 | Home Safety Screening (Scribano, Stevens, Marshall, Gleason, & Kelleher, 2011)                                               | N/A                      | Not a measure of child maltreatment                                  |
| 66 | Identification of Parents At Risk for Child Abuse and Neglect (van der Put et al., 2017)                                     | IPARAN                   | Not developed in English                                             |
| 67 | Index of Child Care Environment (Anme et al., 2013)                                                                          | ICCE                     | Not developed in English                                             |
| 68 | Invalidating Childhood Environments Scale (Mountford, Corstorphine, Tomlinson, & Waller, 2007)                               | ICES                     | Not a measure of child maltreatment                                  |
| 69 | Inventory on Beliefs and Attitudes Towards Domestic Violence (Hutchinson & Doran, 2017)                                      | N/A                      | Not a measure of child maltreatment                                  |
| 70 | ISPCAN Child Abuse Screening Tool Children's Version (Zolotor et al., 2009)                                                  | ICAST-C                  | Not a parent-report measure                                          |
| 71 | ISPCAN Child Abuse Screening Tool Parents' Version (Runyan et al., 2009)                                                     | ICAST-P                  | Developed in multiple languages                                      |
| 72 | ISPCAN Child Abuse Screening Tools Retrospective Version (Dunne et al., 2009)                                                | ICAST-R                  | Not a parent-report measure                                          |
| 73 | Japanese version of Conflict Tactics Scale <sup>b</sup> (Baba et al., 2017)                                                  | CTS1: Japanese version   | Developed in English but translated and validated in other languages |
| 74 | Juvenile Victimization Questionnaire (Finkelhor, Hamby, Ormrod, & Turner, 2005)                                              | JVQ                      | Not a parent-report measure                                          |

(Continued)

**Appendix B. (continued)**

| No  | Instrument <sup>a</sup> (alphabetical order)                                                                     | Abbreviation | Reason for exclusion                |
|-----|------------------------------------------------------------------------------------------------------------------|--------------|-------------------------------------|
| 75  | Maternal Characteristics Scale (Polansky, Gaudin, & Kilpatrick, 1992)                                            | MCS          | Not a measure of child maltreatment |
| 76  | Maternal discipline and appropriateness <sup>b</sup> (Padilla-Walker, 2008)                                      | N/A          | Not a parent-report measure         |
| 77  | Maternal Responsiveness Questionnaire (Leerkes & Qu, 2017)                                                       | MRQ          | Not a measure of child maltreatment |
| 78  | Maternal Self-report Support Questionnaire (D. W. Smith et al., 2010)                                            | MSSQ         | Not a measure of child maltreatment |
| 79  | Maternal Support Questionnaire–Child Report (D. W. Smith et al., 2017)                                           | MSQ-CR       | Not a measure of child maltreatment |
| 80  | Meaning of the Child Interview (Grey & Farnfield, 2017)                                                          | MotC         | Not a measure of child maltreatment |
| 81  | Measure of Parenting Style (Parker et al., 1997)                                                                 | MOPS         | Not a parent-report measure         |
| 82  | Measure Trauma Associated with Child Sexual Abuse (Choudhary, Satapathy, & Sagar, 2018)                          | MSCSA        | Not a measure of child maltreatment |
| 83  | Measures of Community-Relevant Outcomes for Violence Prevention Programs <sup>b</sup> (Hausman et al., 2013)     | N/A          | Not a measure of child maltreatment |
| 84  | Medical History Questionnaire <sup>b</sup> (Famularo, Fenton, & Kinscherff, 1992)                                | N/A          | Not a measure of child maltreatment |
| 85  | Minnesota Multiphasic Personality Inventory-2 (Butcher, Dahlstrom, Graham, Tellegen, & Kreamer, 1989)            | MMPI-2       | Not a measure of child maltreatment |
| 86  | Multidimensional Assessment of Parenting Scale (Parent & Forehand, 2017)                                         | MAPS         | Not a measure of child maltreatment |
| 87  | Multidimensional Inventory for Assessment of Parental Functioning (Reis, Orme, Barbera-Stein, & Herz, 1987)      | N/A          | Not a measure of child maltreatment |
| 88  | Multidimensional Neglectful Behavior Scale: Adolescent and Adult Recall Version (Dubowitz et al., 2011)          | MNBS-A       | Not a parent-report measure         |
| 89  | Multidimensional Neglectful Behavior Scale-Child Report (Beyazit & Ayhan, 2018)                                  | MNBS-CR      | Not a parent-report measure         |
| 90  | National Council on Crime and Delinquency Indicators (Wood, 1997)                                                | N/A          | Not a parent-report measure         |
| 91  | Needs-Based Assessment of Parental (Guardian) Support (Bolen, Lamb, & Gradante, 2002)                            | NAPS         | Not a measure of child maltreatment |
| 92  | Neglect Scale (Harrington, Zuravin, DePanfilis, Ting, & Dubowitz, 2002)                                          | N/A          | Not a parent-report measure         |
| 93  | Parent Cognition Scale <sup>b</sup> (Snarr, Slep, & Grande, 2009)                                                | N/A          | Not a measure of child maltreatment |
| 94  | Parent discipline style <sup>b</sup> (Mezzich et al., 2007)                                                      | N/A          | Not a measure of child maltreatment |
| 95  | Parent Perception Inventory (Glaser, Horne, & Myers, 1995)                                                       | PPI          | Not a measure of child maltreatment |
| 96  | Parent Perception Inventory-Child version (Bruce et al., 2006)                                                   | PPIC         | Not a measure of child maltreatment |
| 97  | Parent Problem Checklist (Stallman, Morawska, & Sanders, 2009)                                                   | PPC          | Not a measure of child maltreatment |
| 98  | Parent Qualities Measure (Crick, 2006; Stallman et al., 2009)                                                    | PQM          | Not a measure of child maltreatment |
| 99  | Parent Threat Inventory (Crick, 2006; Scher, Stein, Ingram, Maccarne, & McQuaid, 2002)                           | PTI          | Not a parent-report measure         |
| 100 | Parental Acceptance-Rejection Questionnaire (Rohner & Khaleque, 2005)                                            | PARQ         | Not a parent-report measure         |
| 101 | Parental Anger Inventory (Scher et al., 2002; Sedlar & Hansen, 2001)                                             | PAI          | Not a measure of child maltreatment |
| 102 | Parental Authority Questionnaire (Buri, 1991)                                                                    | PAQ          | Not a measure of child maltreatment |
| 103 | Parental Emotion Regulation Inventory (Lorber, Del Vecchio, Feder, & Smith Slep, 2017; Sedlar & Hansen, 2001)    | PERI         | Not a measure of child maltreatment |
| 104 | Parental Empathy Measure (Kilpatrick, 2005; Lorber et al., 2017)                                                 | PEM          | Not a measure of child maltreatment |
| 105 | Parent-Child Activities Interview (Kilpatrick, 2005; Lefever et al., 2008)                                       | PCA          | Not a parent-report measure         |
| 106 | PARENT-INFANT RELATIONSHIP GLOBAL ASSESSMENT SCALE (Lefever et al., 2008; THREE, 2005)                           | PIR-GAS      | Not a measure of child maltreatment |
| 107 | Parenting Anxious Kids Ratings Scale-Parent Report (Flessner, Murphy, Brennan, & D'Auria, 2017; THREE, 2005)     | PAKRS-PR     | Not a measure of child maltreatment |
| 108 | Parenting Behavior Rating Scales (Flessner et al., 2017; G. A. King, Rogers, Walters, & Oldershaw, 1994)         | N/A          | Not a parent-report measure         |
| 109 | Parenting Daily Diary (G. A. King et al., 1994; Peterson, Tremblay, Ewigman, & Popkey, 2002)                     | N/A          | Not a parent-report measure         |
| 110 | Parenting Practices Questionnaire-Corporal Punishment (Avinun, Davidov, Mankuta, Knafo-Noam, & Knafo-Noam, 2018) | PPQ-CP       | Not a measure of child maltreatment |

(Continued)

**Appendix B. (continued)**

| No  | Instrument <sup>a</sup> (alphabetical order)                                                                                    | Abbreviation | Reason for exclusion                |
|-----|---------------------------------------------------------------------------------------------------------------------------------|--------------|-------------------------------------|
| 111 | Parenting Scale (Peterson et al., 2002; Salari, Terreros, & Sarkadi, 2012)                                                      | PS           | Not a measure of child maltreatment |
| 112 | Parenting Support Needs Assessment (Murry & Lewin, 2014; Salari et al., 2012)                                                   | PSNA         | Not a measure of child maltreatment |
| 113 | Plotkin Child Vignettes (Plotkin, 1983)                                                                                         | PCV          | Not a measure of child maltreatment |
| 114 | Post-Divorce Parental Conflict Scale (Morris & West, 2000; Murry & Lewin, 2014)                                                 | PPCS         | Not a measure of child maltreatment |
| 115 | Preschool Symptom Self-Report (Martini, Strayhorn, & Puig-Antich, 1990)                                                         | PRESS        | Not a measure of child maltreatment |
| 116 | Production of Discipline Alternatives (Rodriguez, Wittig, & Christl, 2019)                                                      | PDA          | Not a parent-report measure         |
| 117 | Protective Factors Survey (Counts, Buffington, Chang-Rios, Rasmussen, & Preacher, 2010; Martini et al., 1990)                   | PFS          | Not a measure of child maltreatment |
| 118 | Psychological Maltreatment Rating Scales (Brassard, Hart, & Hardy, 1993; Counts et al., 2010)                                   | PMRS         | Not a parent-report measure         |
| 119 | Psychological Neglect (Brassard et al., 1993; Christ, Kwak, & Lu, 2017)                                                         | N/A          | Not a parent-report measure         |
| 120 | Psychologically Violent Parental Practices Inventory (Christ et al., 2017; Gagne, Pouliot-Lapointe, & St-Louis, 2007)           | PVPPI        | Not developed in English            |
| 121 | Questionnaire for evaluating maltreatment and neglect (Calheiros, Patrício, Graça, & Magalhães, 2018)                           | N/A          | Not developed in English            |
| 122 | Reflective Parenting Assessment (Ensink, Leroux, Normandin, Biberdzic, & Fonagy, 2017; Gagne et al., 2007)                      | RPA          | Not a measure of child maltreatment |
| 123 | Responsiveness Index (Ensink et al., 2017; Yates, Hull, & Huebner, 1983)                                                        | N/A          | Not a parent-report measure         |
| 124 | Revised Child Anxiety and Depression Scale Parent Version (Ebesutani, Tottenham, & Chorpita, 2015; Yates et al., 1983)          | RCADS-P      | Not a measure of child maltreatment |
| 125 | Risk Scale <sup>b</sup> (Ebesutani et al., 2015; Grietens, Geeraert, & Hellinckx, 2004)                                         | N/A          | Not a parent-report measure         |
| 126 | Rorschach Inkblot Method (Choca, 2013; Grietens et al., 2004)                                                                   | RIM          | Not a measure of child maltreatment |
| 127 | Scale of Negative Family Interactions (Choca, 2013; Simonelli, Mullis, & Rohde, 2005)                                           | SNFI         | Not a parent-report measure         |
| 128 | Screen for Adolescent Violence Exposure for children version (Flowers, Lanclos, & Kelley, 2002; Simonelli et al., 2005)         | KID-SAVE     | Not a parent-report measure         |
| 129 | Sexual Abuse Indicators (Flowers et al., 2002; Terrell et al., 2008)                                                            | SAI          | Not a parent-report measure         |
| 130 | Sexual Behavior Problems Questionnaire <sup>b</sup> (Hall, Mathews, & Pearce, 1998; Terrell et al., 2008)                       | N/A          | Not a parent-report measure         |
| 131 | Sexual Events Questionnaire (Finkelhor, 1979; Hall et al., 1998)                                                                | SEQ          | Not a parent-report measure         |
| 132 | Sexual Experiences Survey (Finkelhor, 1979; Koss & Gidycz, 1985)                                                                | SES          | Not a parent-report measure         |
| 133 | Shaken Baby Syndrome Awareness Assessment (Koss & Gidycz, 1985; Russell & Britner, 2006)                                        | SBS          | Old version of a revised measure    |
| 134 | Sixteen Personality Factor Questionnaire (Francis, Hughes, & Hitz, 1992; Russell & Britner, 2006)                               | 16-PF        | Not a measure of child maltreatment |
| 135 | Social Factors and Children Violence Questionnaire (Francis et al., 1992; Oni & Adetoro, 2014)                                  | SPCVQ        | No psychometric data found          |
| 136 | Standardized Observation Codes (Cerezo, Keesler, Dunn, & Wahler, 1986; Oni & Adetoro, 2014)                                     | SOC III      | Not a measure of child maltreatment |
| 137 | Structured Problem Analysis of Raising Kids (Cerezo et al., 1986; Staal, van den Brink, Hermanns, Schrijvers, & van Stel, 2011) | SPARK        | Not a measure of child maltreatment |
| 138 | Supervisory Neglect (Coohey, 2003; Staal et al., 2011)                                                                          | N/A          | Not a parent-report measure         |
| 139 | Symptoms of Trauma Scale (Coohey, 2003; Ford et al., 2017)                                                                      | SOTS         | Not a measure of child maltreatment |
| 140 | Trauma Experiences Checklist (Cristofaro et al., 2013; Ford et al., 2017)                                                       | TEC          | Not a measure of child maltreatment |
| 141 | Trauma history questionnaire (Cristofaro et al., 2013; Hooper, Stockton, Krupnick, & Green, 2011)                               | THQ          | Not a parent-report measure         |
| 142 | Trauma Symptom Checklist for Children (Briere et al., 2001; Hooper et al., 2011)                                                | TSCC         | Not a measure of child maltreatment |
| 143 | Trauma Symptom Checklist for Young Children (Briere et al., 2001)                                                               | TSCYC        | Not a measure of child maltreatment |

(Continued)

**Appendix B.** *(continued)*

| No  | Instrument <sup>a</sup> ( <i>alphabetical order</i> )                                                   | Abbreviation            | Reason for exclusion                |
|-----|---------------------------------------------------------------------------------------------------------|-------------------------|-------------------------------------|
| 144 | U.S. military's Family Advocacy Program Severity Index (Briere et al., 2001; A. M. Slep & Heyman, 2004) | USAF-FAP Severity Index | Not a parent-report measure         |
| 145 | Violent Experiences Questionnaire-Revised (A. R. King & Russell, 2017; A. M. Slep & Heyman, 2004)       | VEQ-R                   | Not a parent-report measure         |
| 146 | Weekly Problems Scales (A. R. King & Russell, 2017; Sawyer, Tsao, Hansen, & Flood, 2006)                | WPS                     | Not a measure of child maltreatment |
| 147 | When Bad Things Happen Scale (Fletcher, 1995; Sawyer et al., 2006)                                      | WBTH                    | Not a measure of child maltreatment |
| 148 | Young Parenting Inventory (Young, Klosko, & Weishaar, 2003)                                             | YPI                     | Not a parent-report measure         |
| 149 | Young Parenting Inventory-Revised (Louis, Wood, & Lockwood, 2018)                                       | YPI-R2                  | Not a parent-report measure         |
| 150 | Young Schema Questionnaire-Short form 3 (Young, 2005)                                                   | YSQ-S3                  | Not a parent-report measure         |

Notes. N/A = Not Applicable (No Abbreviation).

<sup>a</sup> References of the excluded instruments in this review are available from the first author upon request.

<sup>b</sup> Unofficial title retrieved from publication content as an instrument published without a title or abbreviation.
